# Supplementary material for: A novel flexible phase change composite with electro-driven shape memory, energy conversion/storage and motion sensing properties
Source: Royal Society of Chemistry journal article supplement (doi:10.1039/c9ta09088f), 2019-01-01
Supplement: c9ta09088f1.pdf [file c9ta09088f1.pdf]

## Supplementary Information

### Novel flexible phase change composite with electro-driven shape memory, energy conversion/storage and motion sensing properties

Malik Muhammad Umair,<sup>a</sup> Yuang Zhang,<sup>a</sup> Shufen Zhang,<sup>a</sup> Xin Jin<sup>b</sup> and Bingtao Tang<sup>\*,a,b</sup>

<sup>a</sup>State Key Laboratory of Fine Chemicals, Dalian University of Technology, Dalian 116024, China.

<sup>b</sup>Eco-chemical Engineering Cooperative Innovation Center of Shandong, Qingdao University of Science and Technology, Qingdao 266042, PR China

\* Corresponding author. Tel.: +86 411 84986267

E-mail address: tangbt@dlut.edu.cn (B. Tang).

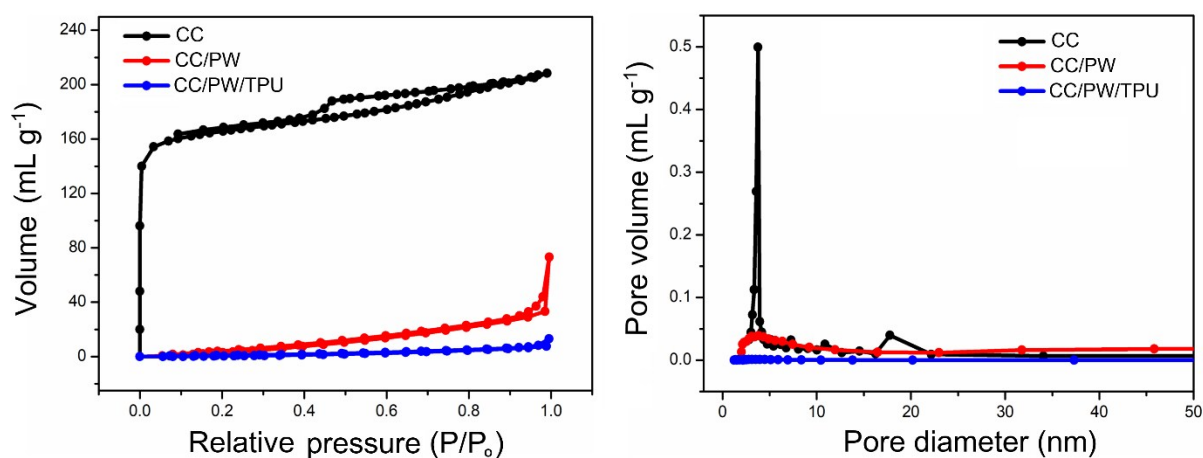

**Fig. S1.** BET analysis of CC, CC/PW and CC/PW/TPU. (a) N<sub>2</sub> adsorption and desorption isotherms and (b) the corresponding pore size distributions.

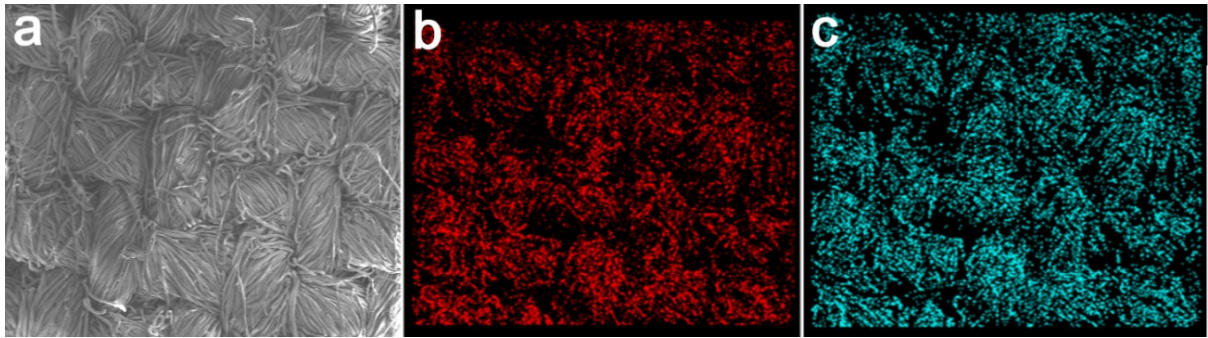

**Fig. S2.** (a) SEM image of pristine cotton cloth and its elemental mapping showing presence of almost equal composition ratio of (b) C and (c) O elements.

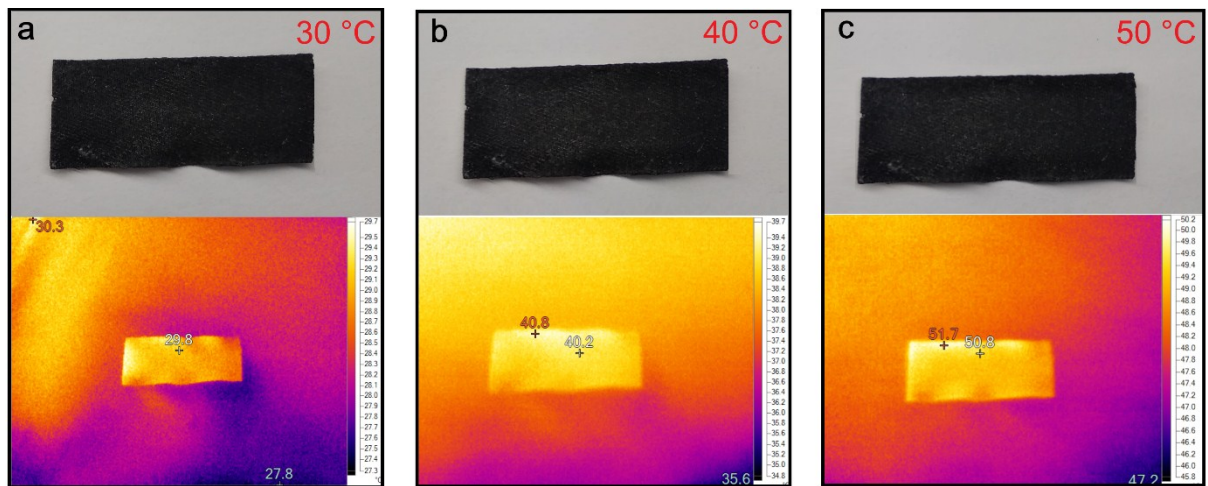

**Fig. S3.** Form-stability test of CC/PW/TPU performed by heating each time for 15 mins at various temperatures.

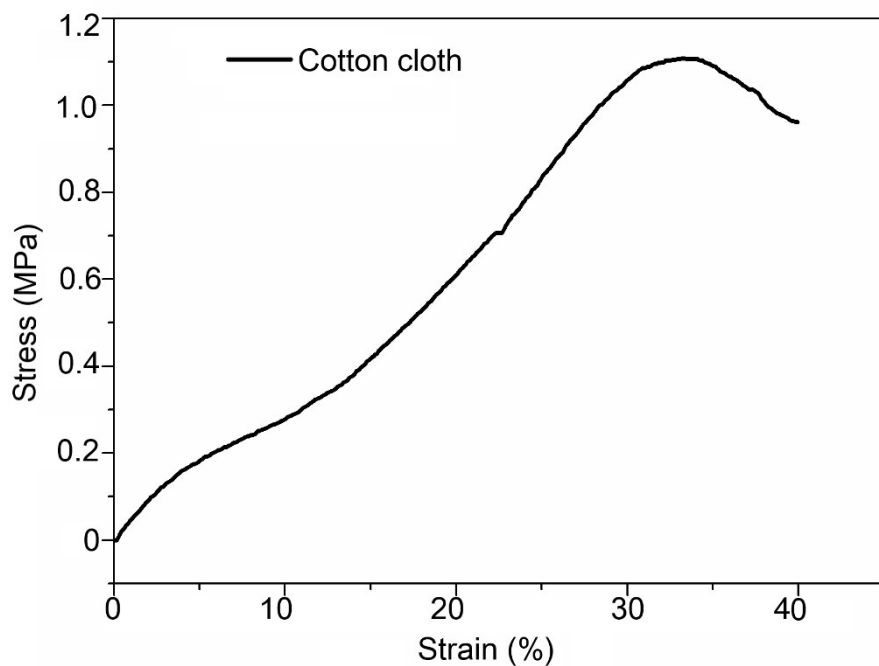

**Fig. S4.** The stress-strain curves of cotton cloth obtained at a crosshead speed of  $10 \text{ mm min}^{-1}$ .

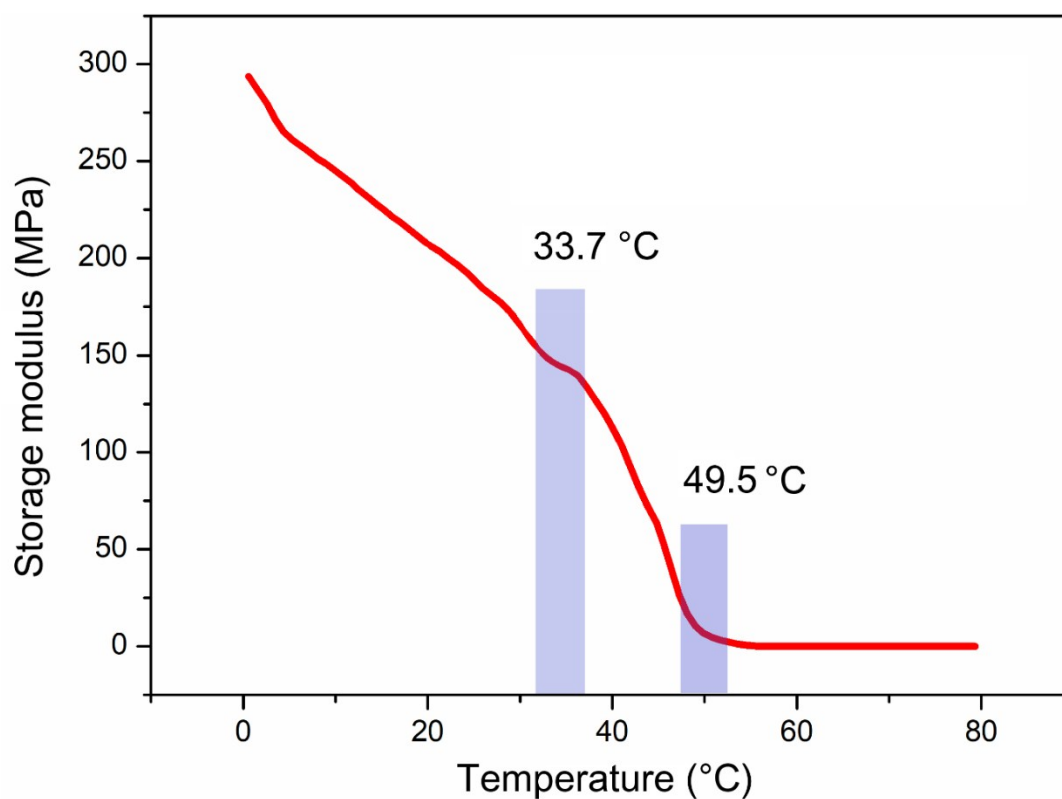

**Fig. S5.** DMA analysis of CC/PW/TPU showing onset transition temperatures of PW and TPU.

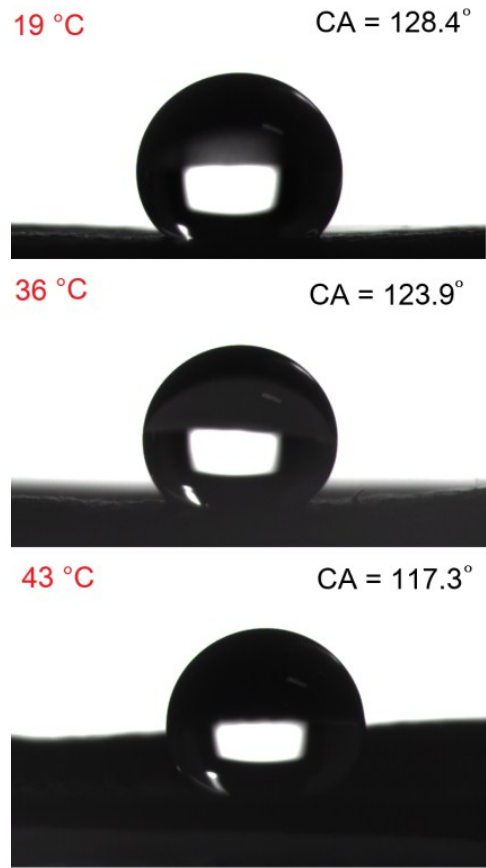

**Fig. S6.** Contact angle measurements of CC/TPU at different temperatures.

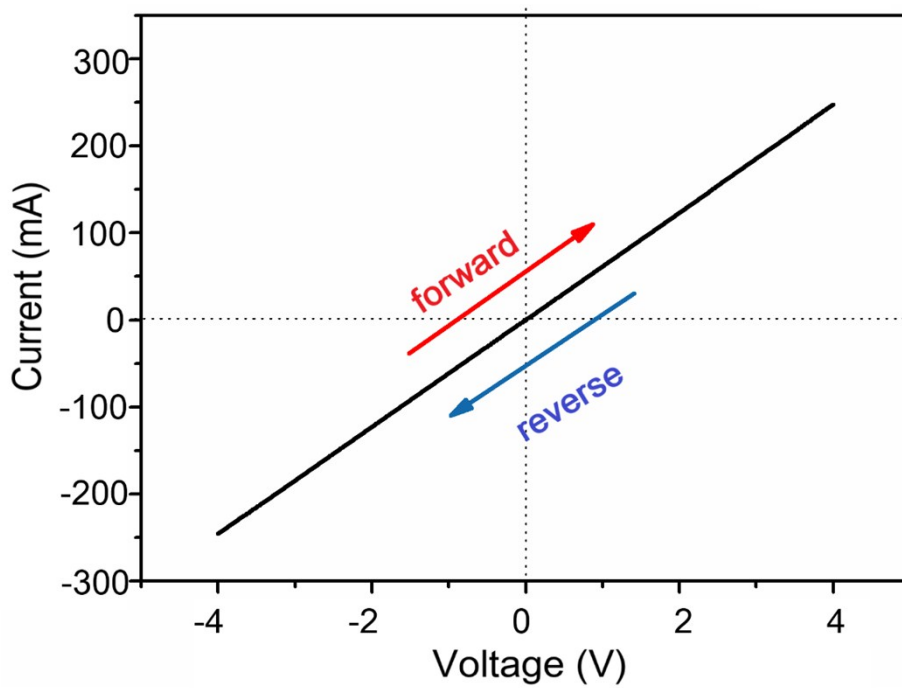

**Fig. S7.** I-V curves of CC.

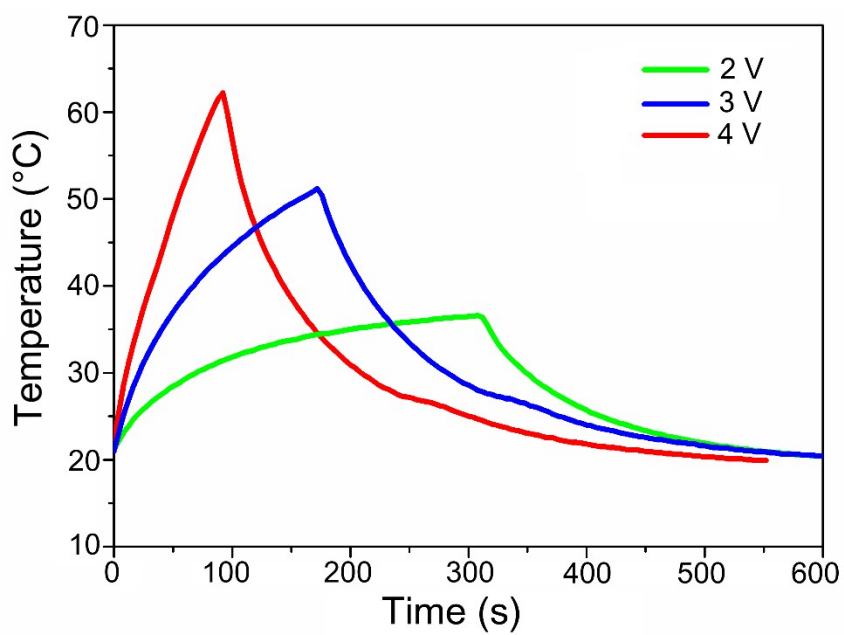

**Fig. S8.** Electrothermal conversion curves of CC at applied voltage of 2 V, 3 V and 4 V.

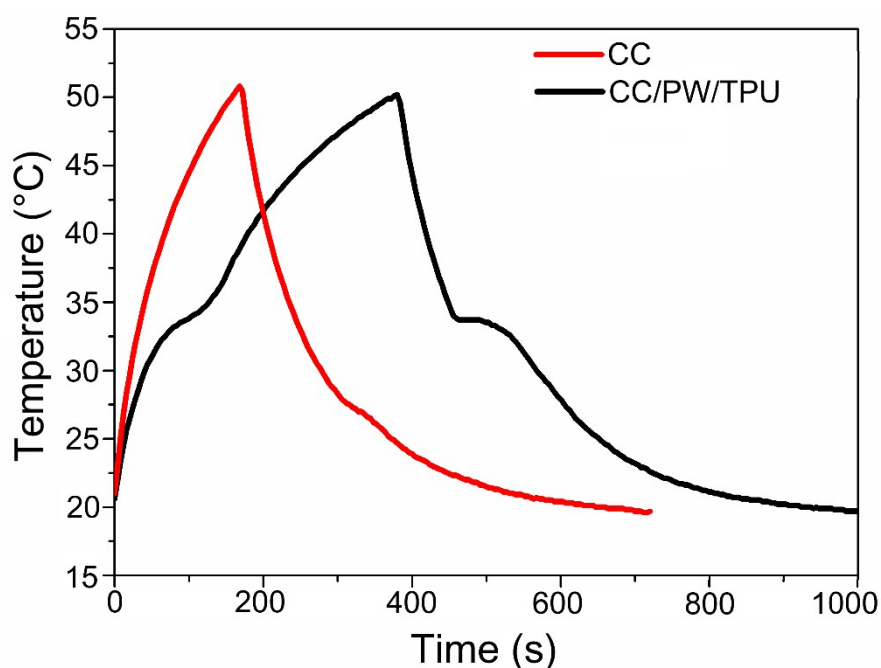

**Fig. S9.** Comparison of electrothermal conversion performance of CC and CC/PW/TPU samples under applied voltage of 3 V. After electro heating the samples to 50 °C, the applied voltage was removed and sample cooled down to ambient temperature (20°C).

**Table S1.** BET analysis of the samples.

| Samples   | BET surface area (m <sup>2</sup> g <sup>-1</sup> ) | Pore volume (mL g <sup>-1</sup> ) |
|-----------|----------------------------------------------------|-----------------------------------|
| CC        | 503.8                                              | 0.32                              |
| CC/PW     | 44.2                                               | 0.11                              |
| CC/PW/TPU | 0                                                  | 0                                 |

**Table S2.** DSC data of the samples

| Samples   | $\Delta H_m$ (J g <sup>-1</sup> ) | $T_m$ (°C) | $\Delta H_f$ (J g <sup>-1</sup> ) | $T_f$ (°C) |
|-----------|-----------------------------------|------------|-----------------------------------|------------|
| PW        | 196.3                             | 34.02      | 196.1                             | 31.72      |
| TPU       | 3.9, 13.6                         | 41.3, 49.5 | 42.33                             | 19.20      |
| PW/CC/TPU | 93.56                             | 34.1       | 82.44                             | 31.46      |
